TABLE 1. Comparison of Cooling Rates (Maximum Rates Recorded by Esophageal Thermistors)\*

| Degrees C/Hour  |            |
|-----------------|------------|
| Ice Packing     | Forced Air |
| 7.3             | 8.5        |
| 5.5             | 10.0       |
| 8.0             | 7.4        |
| 8.2             | 6.3        |
| 6.7             | 9.5        |
| 7.1 ± 0.5 (SEM) | 8.3 ± 0.7  |

\* Results were compared by Student's t test for paired data. Significance was defined as  $P < 0.05$ .

peratures were increased from 37 to 41.5 C in ten patients during thiopental-fentanyl anesthesia, oxygen consumption increased to only 50 per cent above normothermic control values (fig. 1).

In the study reported by Fraser, the patients were cooled by increasing evaporative heat loss (removing the drapes and alcohol sponging) and by applying ice packs. We have compared these two methods of cooling at the conclusion of whole-body hyperthermia treatments. On five separate occasions, a 71-kg male patient was cooled from 41.8 to 37 C by surrounding the anterior trunk and extremities with ice. On five subsequent occasions, the same patient was cooled by directing a forced-air stream over the exposed body surfaces. Room temperature was maintained between 24 and 27 C and relative humidity between 30 and 40 per cent. There was no significant difference in the rates of cooling by the two methods (table 1).

Packing with ice offered no advantage over increas-

ing evaporative cooling, and was a cumbersome technique. Evaporative cooling is rapid because of the high latent heat of vaporization for water (540 cal/g). It should be noted that alcohol sponging is not necessary and may, in fact, be hazardous.<sup>4</sup>

With modern air-conditioning, and to-and fro circuits no longer in use, intraoperative hyperthermia is an uncommon event. The report by Fraser illustrates the need to consider all possible etiologies before implementing a specific therapeutic regimen that may not be without its own risks. Complex problems often require only a simple solution.

DAVID ERIC LEES, M.D.  
YOUNG DUK KIM, M.D.  
WILLIAM SCHUETTE, B.E.E.  
JOAN BULL, M.D.  
JACQUELINE WHANG-PENG, M.D.  
*Whole Body Hyperthermia Unit  
Clinical Center  
National Institutes of Health  
Bethesda, Maryland 20014*

## REFERENCES

1. Fraser JG: Iatrogenic benign hyperthermia in children. *ANESTHESIOLOGY* 48:375, 1978
2. Pettigrew RT, Galt JM, Ludgate CM, et al: Clinical effects of whole-body hyperthermia in advanced malignancy. *Br Med J* 4:679-682, 1974
3. Wakim KG: Bodily reactions to high temperatures. *ANESTHESIOLOGY* 25:532-548, 1964
4. Moss MH: Alcohol-induced hypoglycemia and coma caused by alcohol sponging. *Pediatrics* 46:445-447, 1970

(Accepted for publication July 21, 1978.)

Anesthesiology  
50:70, 1979

## Averaging Values for Gastric pH Incorrect

*To the Editor:*—Please permit me to point out a frequently made, but nevertheless serious, error in the calculation of data from measurements of acidity of gastric contents using pH. Stoelting has reported a mean and standard error of pH in tables 3 and 4, and the editors permitted this computation.<sup>1</sup> pH is defined as the negative logarithm of the hydrogen ion concentration. A quick review of algebra tells us that in a logarithm, the number before the decimal is the *characteristic* (tells us where to put the decimal in the real number) and the number behind the decimal is the *mantissa* (gives us the identity of the real number from a table). Logarithms cannot be averaged until they have been converted back to real numbers. The same mistake, of course, has been made with blood data, where the *characteristic* is usually 7 and the magnitude of error is no more than a factor of 10. By

contrast, gastric pH values range from 1 to 9 and errors in the magnitude of one million are possible.

In spite of a disagreement with the author on his mathematics, I concur with his conclusions, but would enjoy seeing his results analyzed appropriately.

A. H. GIESECKE, JR., M.D.  
*Professor and Vice-Chairman  
Department of Anesthesiology  
The University of Texas, Southwestern Medical School  
at Dallas  
5201 Harry Hines Boulevard  
Dallas, Texas 75235*

## REFERENCE

1. Stoelting RK: Responses to atropine, glycopyrrolate and Riopan of gastric fluid pH and volume in adult patients. *ANESTHESIOLOGY* 48:367-369, 1978

(Accepted for publication July 21, 1978.)
